# *Funalichnus bhubani* isp. nov. from Bhuban Formation, Surma Group (Lower -Middle Miocene) of Aizawl, Mizoram, India

Raghavendra Prasad Tiwari<sup>1\*</sup>, Chinmoy Rajkonwar<sup>1</sup>, Satish Jaychandbhai Patel<sup>2</sup>

**1** Department of Geology, Mizoram University, Aizawl, Mizoram, India, **2** Department of Geology, Faculty of Science, the Maharaja Sayajirao University, Baroda, Vadodara, Gujarat, India

## Abstract

A new ichnospecies of the ichnogenus *Funalichnus* Pokorný is described from the Middle Bhuban Unit, Bhuban Formation, Surma Group (Lower - Middle Miocene) of Aizawl, Mizoram, India. *Funalichnus bhubani* isp. Nov. Is a large burrow displaying cylindrical segments that are oriented nearly perpendicular to the bedding plane. The new ichnospecies can be identified on the basis of general form, size, unlined passive filling and twisted rod-like structure. The association of *Funalichnus bhubani* isp. Nov. With *Arenicolites*, *Diplocraterion*, *Ophiomorpha* *Psilonichnus* *Skolithos* and *Thalassinoides* points to its bathymetric restriction. The deep extension of the burrow in clastic sediments provides a favourable condition for preservation in the shoreface environment and occurrence in fine- to medium-grained clastic sediments may be a preservational preference.

**Citation:** Tiwari RP, Rajkonwar C, Patel SJ (2013) *Funalichnus bhubani* isp. nov. from Bhuban Formation, Surma Group (Lower -Middle Miocene) of Aizawl, Mizoram, India. PLoS ONE 8(10): e77839. doi:10.1371/journal.pone.0077839

**Editor:** Erik V. Thuesen, The Evergreen State College, United States of America

**Received:** March 10, 2013; **Accepted:** September 3, 2013; **Published:** October 18, 2013

**Copyright:** © 2013 Tiwari et al. This is an open-access article distributed under the terms of the Creative Commons Attribution License, which permits unrestricted use, distribution, and reproduction in any medium, provided the original author and source are credited.

**Funding:** Department of Science & Technology, Govt. of India, New Delhi, grant received vide no. ESS/16/254(3)/2005. The funders had no role in study design, data collection and analysis, decision to publish, or preparation of the manuscript.

**Competing interests:** The authors have declared that no competing interests exist.

\* E-mail: rptmzu@rediffmail.com

## Introduction

Fritsch [1] described ichnospecies *Furoides strangulates* from the Upper Cretaceous of the Bohemian Basin, Czech Republic. Later, Pokorný [2] studied museum collections of Fritsch [1] and additional materials from the type localities of the Bohemian Basin and re-designated it as a new ichnogenus *Funalichnus* and its type ichnospecies *Funalichnus strangulates* [2].

The purpose of the paper is to describe a new ichnospecies *Funalichnus bhubani* from the Middle Bhuban Unit of the Bhuban Formation, Surma Group (Lower - Middle Miocene) of Aizawl, Mizoram, India. Environmental and preservational aspects of the new ichnospecies are discussed to refine the ichnofacies association. Earlier records of trace fossils from the Cenozoic succession of Mizoram include *Palaeophycus* from Barail succession [3], *Teredolites clavatus* from Upper Bhuban Unit of Bhuban Formation [4], and a diversified assemblage belonging to *Skolithos* and *Cruziana* ichnofacies from the Middle and Upper Bhuban Units of the Bhuban Formation [5,6].

## Location and Geology

The sedimentary succession of Mizoram has been geologically subdivided into the Barail (Oligocene), the Surma (Lower to Middle Miocene) and the Tipam groups (Upper Miocene to early Pliocene) in ascending order [7,8]. The nearly 8000 m thick rock succession exposed in the Mizoram state, India, comprises a series of N-S trending elongated folds having a sub-meridional trend and arcuate shape with westward convexity. The Mizoram area has ~6000 m of exposed Surma succession constituting the depocentre for the Surma Group. This group consists of a repetitive succession of arenaceous and argillaceous rocks with a few intercalations of shell limestone, calcareous sandstone and intraformational conglomerate [8]. It has been subdivided into the Bhuban and the Bokabil Formations. The Bhuban Formation is the thickest lithostratigraphic unit in the Mizoram State attaining ~5000 m of thickness and is further subdivided into Lower, Middle and Upper Bhuban Units. The main lithologies of Bhuban Formation are sandstone, siltstone, shale, mudstone and their admixtures in various proportions. The ages of these stratigraphic units have been constrained on the basis of the fossil contents [9–13].

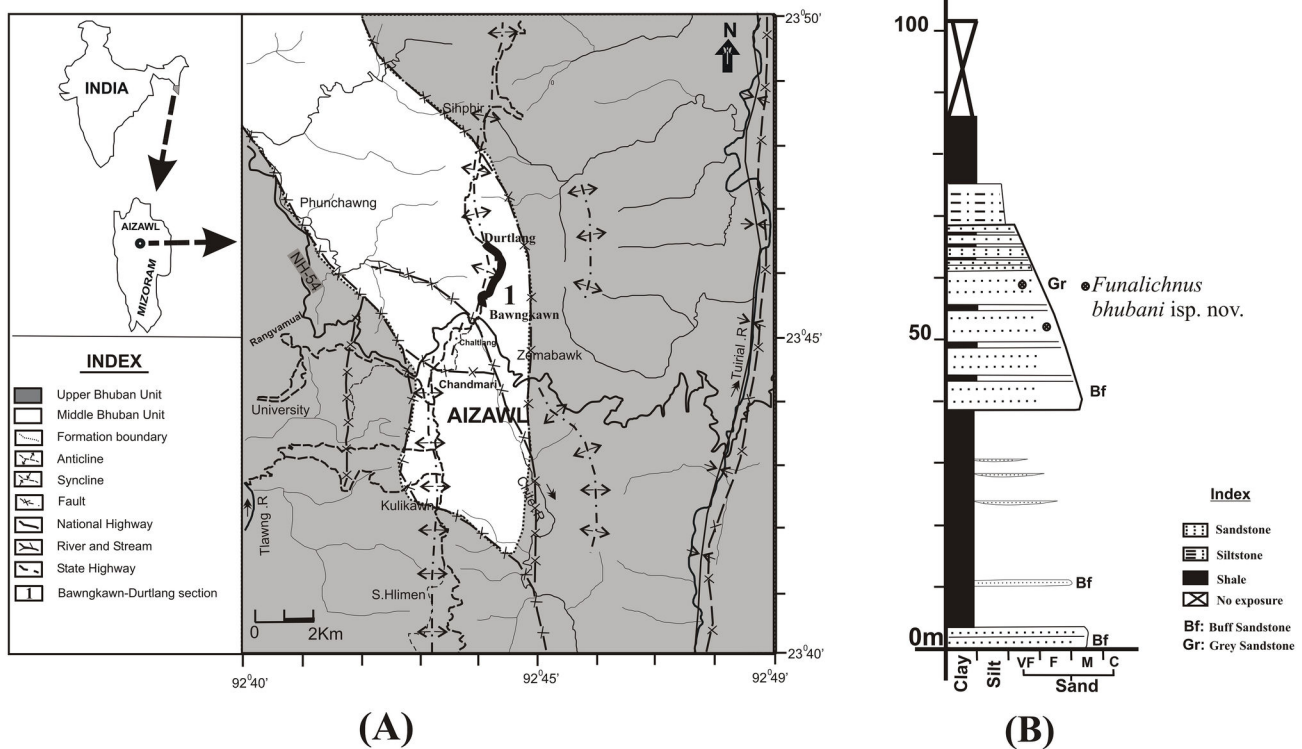

**Figure 1. Study Area (a) Location and geological map. (B). Litho-column of a part of Bawngkawn-Durtlang section showing trace fossil yielding silty-sandstone bed.**

doi: 10.1371/journal.pone.0077839.g001

The material described in this paper comes from the Bawngkawn-Durtlang road section (latitude 23°45'21.9" N to 23°46'10.5" N and longitude 92°43'51.9" E to 92°44'08" E) on the northern part of Aizawl city, Mizoram, North East India (Figure 1). Nearly 615 m of rock succession belonging to the lower part of the Middle Bhuban Unit of the Bhuban Formation, Surma Group (Lower - Middle Miocene) age is well exposed in this section. The Middle Bhuban Unit in this section comprises a succession of sandstone, silty-sandstone, siltstone, silty-shale, shale, sandy-shale and mudstone. Fine- to medium-grained grey- and brown-coloured sandstone of this unit is bioturbated and bears a diverse assemblage of trace fossils [6]. The new ichnospecies described in this report comes from grey-coloured sandstone exposed at latitude 23°45'54.2" N and longitude 92°44'04" E. Specific permission was not required to collect fossils from this locality as it is not a part of a national park or other protected area of land.

### Systematic Ichnology

**Ichnogenus:** *Funalichnus* Pokorný, 2008.

**Type ichnospecies:** *Funalichnus strangulatus* Fritsch, 1883.

**Amended Diagnosis** Sub-vertical to vertical, straight, simple burrow, ovoid in cross-section, smooth, ornamented with closely spaced, cylindrical segments oriented obliquely to the axis. Lower termination of the burrow is smooth and tapering.

Burrow fill is structureless, homogenous and finer than the surrounding rock.

**Ichnospecies** *Funalichnus bhubani* isp. nov.

Figure 2 (A-F).

**Material:** Four sandstone slabs (Ich/D/46, 47, 48 and 49) and four field photographs housed in the Palaeontology Laboratory of the Department of Geology, Mizoram University, Aizawl-796 004, Mizoram, India.

**Holotype:** A sandstone slab bearing registration no. Ich/D/46 (Figure 2A).

**Paratypes:** Sandstone slabs bearing specimen nos. Ich/D/47, 48 and 49 and four field photographs (Figures 2B-F).

**Type Locality:** Bawngkawn-Durtlang road section, Aizawl, Mizoram, North East India (latitude 23°45'54.2" N and longitude 92°44'04" E).

**Type Horizon:** Fine- to medium-grained, grey-coloured and bioturbated sandstone bed of Middle Bhuban Unit, Bhuban Formation, Surma Group (Lower to Middle Miocene).

**Etymology:** The specific name is derived from the occurrence of this ichnospecies in the Bhuban Formation of Mizoram, India.

**Diagnosis:** Long, smooth, cylindrical, unlined, unbranched, vertical or steeply inclined burrow ornamented with closely spaced, distinct, cylindrical segments oriented either perpendicular or slightly oblique to the axis. Dimensions of segments are mostly uniform but vary slightly along the length.

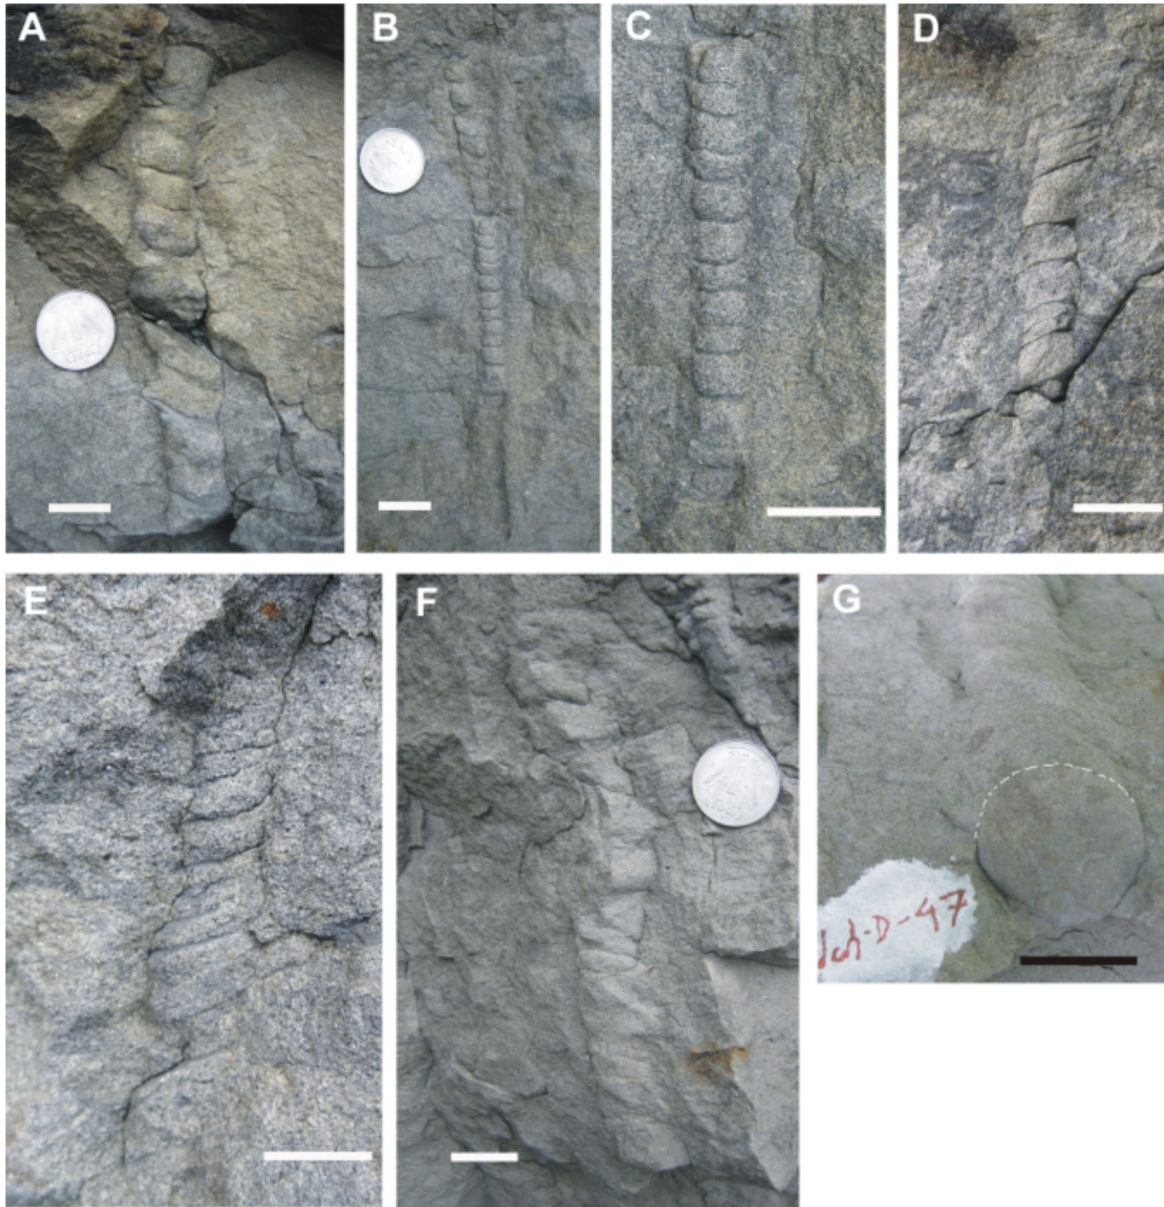

**Figure 2. Photographs of *Funalichnus bhubani* isp. nov.** Scale bar in every figure is 20 mm.

A. *Funalichnus bhubani* isp. nov., holotype, vertical burrow consisting of cylindrical segments with uniform dimensions, lower part shows variation in segment direction. (Registration No. Ich/D/46).

B. *Funalichnus bhubani* isp. nov., *Paratype*, vertical burrow with uniform segments. Upper and lower parts are poorly preserved.

C. *Funalichnus bhubani* isp. nov., *Paratype*, close-up of Figure 2B shows equi-dimensional segments with horizontal shallow interspaces. *Note:* Upper and lower parts of the burrow are broken.

D. *Funalichnus bhubani* isp. nov., *Paratype*, steeply inclined burrow shows variable dimension of the cylindrical segments and interspaces are inclined towards the left side.

E. *Funalichnus bhubani* isp. nov., *Paratype*, steeply inclined burrow shows variable dimension of the segments and interspaces are inclined towards the left side.

F. *Funalichnus bhubani* isp. nov., *Paratype*, steeply inclined and gently bend showing more irregular forms of segments. Interspaces are inclined towards the right side (Registration No. Ich/D/47).

G. Cross section of Figure 2F showing circular outline.

doi: 10.1371/journal.pone.0077839.g002



**Description:** Endichnial, long, unbranched, vertical to steeply inclined, straight to gently curved and unlined burrow. The burrow consists of a number of small cylindrical segments imparting a twisted rod like structure to the burrow. The interspaces between the cylindrical bodies form curved depressions. Cylindrical bodies of the burrow mostly have uniform dimensions (Figure 2A and 2B) but also show slightly variable dimensions along the length (Figure 2C) and occasionally also display irregular form (Figure 2E). The individual bodies are smooth and are slightly higher as compared to the interspaces, which are usually parallel to the bedding plane (Figure 2A and B) and are inclined to right or left sides (Figures 2A, 2C, 2D and 2E). Cross-section of shaft is circular to sub-circular in outline. Maximum observed length of the burrow is 200 mm (Figure 2B) whereas diameter of the burrow varies from 10 to 36 mm (Figure 2D and 2E). Burrow fill is identical to the host sediments.

**Remarks:** *Funalichnus*, as a new ichnogenus was described by Pokorný [1] from the Upper Cretaceous of the Bohemian Basin, Czech Republic, and includes the type ichnospecies *Funalichnus strangulatus*. Earlier, it was described as *Hamites intermedius* [14,15], *H. strangulatus* [16,17] and *Fucoides strangulatus* [2]. Pokorný [1] described the ichnogenus *Funalichnus*, based on the type material and the additional materials from the subsequent collections from the Upper Cretaceous of the Bohemian Basin, as the small burrow with a maximum length of 51 mm that is characterized by closely spaced swollen ribs with lower termination of the burrow tapering downwards to one side and smooth on the surface.

*Funalichnus bhubani* isp. nov. differs from the type ichnospecies of Pokorný [1] in general morphologic features and dimensions; it is relatively a large burrow with observed length in the range of 120–200 mm and diameter in the range of 10–36 mm. Cylindrical bodies are either symmetrical or asymmetrical and individual segments show slight variation in their morphology and interspaces between them are either horizontal or inclined towards the right (Figure 2A & 2F) or the left (Figure 2D & 2E) side and in some cases diameter gradually increases downwards (Figure 2E).

*Ichnogyrus nididens* described by Bown and Kraus [18] shows tight coiling and is symmetrical forming a closed spiral in which successive whorls are in contact. It is a very large burrow; even incomplete burrow with only six preserved whorls measures 22.2 cm in length and 4.6 cm in diameter. The overall architecture of *Ichnogyrus nididens* [18] is also different from that of *Funalichnus bhubani* isp. nov.

The vertical nature and cylindrical segmented form of *Funalichnus bhubani* isp. nov. indicates that the animal excavated the surrounding compact sediments to its body length and pushed the sediments periodically downward to maintain its position. The nearly uniform nature of the segments points to the systematic work of the animal and also reveals the body size of the burrower. Periodically filled structures are interpreted as a dwelling structure that may have had some combined feeding habits. Dwelling/feeding structures like *Ophiomorpha* and *Thalassinoides* (6) are abundantly found associated with the described new ichnospecies indicating

behaviourally restricted structures that may be interpreted as crustacean burrows.

## Environmental Significance

Burrows considered in this study are found in fine- to medium-grained, grey-coloured and bioturbated sandstone of Middle Bhuban Unit, Bhuban Formation, Surma Group (Lower to Middle Miocene). The lithologies exposed in this section exhibit sedimentary structures such as cross laminations/beddings, ripple marks, sole marks and load casts. *Funalichnus bhubani* isp. nov. occurs in association with *Arenicolites*, *Diplocraterion*, *Psilonichnus* and *Skolithos* which are endichnial burrows of chiefly suspension feeding organisms and are typical members of the *Skolithos* ichnofacies [19,20]. The presence of the *Skolithos* ichnofacies indicates the unconsolidated and shifting nature of the substrate, high energy conditions and a rapid change in the sedimentation rate and erosion of surface sediments [21,22]. The association of *Funalichnus bhubani* isp. nov. with other trace fossils [6] thereby reflects the importance of the local behavioural changes of the trace maker in environmental conditions that prevailed during deposition of the host rocks. Thickly-bedded grey-coloured silty-sandstone facies of the same age that are located near the Durtlang area in Mizoram, India bear *Psilonichnus upsilon* suggesting a backshore marginal marine environment [23]. *Ophiomorpha* and *Thalassinoides* burrows of crustaceans have been described by Rajkonwar [11] and association of *Funalichnus bhubani* isp. nov. with these burrows indicates the changes in the colonization pattern of the benthic community. Abundance of *Arenicolites*, *Diplocraterion*, *Ophiomorpha*, *Psilonichnus* and *Skolithos* and sedimentary characteristics may be attributed to a relatively moderate to high wave and current energy conditions and shifting substrate exploited by the opportunistic animals in the foreshore/shoreface environments. Moreover, associated ichnogenera are intimately related to high-energy shoreface environments indicating that the producer of the *Funalichnus bhubani* isp. nov. also occupied a similar type of environmental setting. The ichnofossils of the *Skolithos* ichnofacies are produced by suspension feeders and are associated with a relatively high level of wave or current energy, typically developed in a clean well-sorted loose or shifting substrate [22]. These conditions commonly occur at or near the shoreface and sheltered foreshores but similar conditions also occur in a wide range of high-energy shallow-water environments [23,24]. The deeper extension of burrows belonging to this new ichnospecies in a fine- to medium-grained clastic sediments favoured its preservation.

## Acknowledgements

Critical comments offered by Dr. Alfred Uchman and Dr. Francisco J. Rodriguez-Tovar and an anonymous reviewer have helped to improve the manuscript considerably. We had a fruitful discussion with Dr. J. Malsawma, Department of Geology, Mizoram University during the field work for preparation of litho-columns and collection of trace fossils. We are thankful to Prof. S. K. Shah, Former Head, Dept. of

Geology, Jammu University, India for critically going through the manuscript to improve the language.

reagents/materials/analysis tools: CR. Wrote the manuscript: RPT.

## Author Contributions

Conceived and designed the experiments: RPT. Performed the experiments: CR. Analyzed the data: SJP. Contributed

## References

- Fritsch A (1883). Studien im Gebiete der böhmischen Kreideformation. Paläontologische Untersuchungen der einzelnen Schichten. III. Die Izerschichten. Archiv der naturwissenschaftlichen Landesdurchforschung von Böhmen. Band V, Nr. 2, Comissions—Verlag von František Řivnáč. Prague. p. 139.
- Pokorný R (2008) *Funalichnus*, a new ichnogenus and its type ichnospecies *Funalichnus strangulates* (Fritsch 1883), Upper Cretaceous of the Bohemian Cretaceous Basin, Czech Republic. *Ichnos* 15: 51-58. doi:10.1080/10420940701192922.
- Mehrotra RC, Shukla M, Tiwari RP (2002) Occurrence of *Palaeophycus* in the Barail sediments of Mizoram India. *Biol Memoirs* 28: 45-49.
- Mehrotra RC, Mandaokar BD, Tiwari RP, Rai V (2001) *Teredolites clavatus* from the Upper Bhuban Formation of Aizawl District Mizoram India. *Ichnos* 8: 63-68. doi:10.1080/10420940109380173.
- Tiwari RP, Rajkonwar C, Lalchawimawii, Lalnunluanga P, Malsawma J et al. (2011) Trace fossils from Bhuban Formation, Surma Group (Lower to Middle Miocene) of Mizoram India and their palaeoenvironmental significance. *Journal of Earth System Science* 120: 1127-1143.
- Rajkonwar C, Tiwari RP, Patel SJ (2013) *Arenicolites helix* isp. nov. and associated ichno-species from the Bhuban Formation, Surma Group (Lower-Middle Miocene) of Aizawl, Mizoram, India. *Himalayan Geology* 34: 18-37..
- Karunakaran (1974) Geology and Mineral Resources of the North Eastern States of India. Miscellaneous Publication of Geological Survey of India 30: 93-101
- Ganju JL (1975) Geology of Mizoram. Bulletin Geology, Mineralogical, Metallurgical Society of India 48: 28-40
- Tiwari RP (2006) Mizoram, India: Neogene Palaeontology of the Surma Group. 2- The Tellinoidea (Mollusca: Bivalvia). *Journal of The Palaeontological Society of India* 51: 33-42
- Tiwari RP, Kachhara RP (2003) Molluscan biostratigraphy of the Tertiary sediments of the Mizoram India. *Journal of The Palaeontological Society of India* 48: 59-82
- Tiwari RP (2001) Mizoram, India: Neogene Palaeontology of the Surma Group. The Arcoida (Mollusca: Bivalvia), *Journal of The Palaeontological Society of India* 46: 147-160
- Tiwari RP, Kachhara RP (2000) Two new species of *Apolymetis* (Bivalvia: Tellinidae) from the Miocene of Mizoram, India, *Tertiary Research* 20(1-4):79-84
- Dasgupta S (1982) Synthesis and review of faunal records from the Surma basin. *Rec Geological Surv India*, 112(5): 31-38.
- Geinitz HB (1842) Charakteristik der Schichten und Petrefacten des sächsisch-böhmischen Kreidegebirges. Drittes Heft, Die sächsisch-böhmische Schweiz, die Oberlausitz und das Innere von Böhmen. Der Arnoldischen Buchhandlung Dresden Leipzig. 1. Auflage. pp. 63–116
- Geinitz HB (1850) Charakteristik der Schichten und Petrefacten des sächsisch-böhmischen Kreidegebirges. Drittes Heft, Die sächsisch-böhmische Schweiz, die Oberlausitz und das Innere von Böhmen. Der Arnoldischen Buchhandlung Dresden Leipzig., 2. Auflage. pp.63–116
- d'Orbigny A (1850). ours élémentaire de Paleontol et de Geol stratigraphiques 1: 1-299.
- Fritsch A, Schloenbach U (1872) Cephalopoden der böhmischen Kreideformation. Verlag des Verfassers. Commission Bei František Řivnáč Prague: 51.
- Bown TM, Kraus MJ (1983) Ichnofossils of the alluvial Willwood Formation (Lower Eocene), Bighorn Basin, Northwest Wyoming, USA. *Palaeogeogr Palaeoclimatol Palaeoecol* 43: 95-128. doi: 10.1016/0031-0182(83)90050-0.
- Seilacher A (1967) Bathymetry of trace fossils. *Mar Geol* 5: 413-428. doi:10.1016/0025-3227(67)90051-5.
- Maceachern JA, Pemberton SG (1992) Ichnological aspects of Cretaceous shoreface successions and shoreface variability in the Western Interior Seaway of North America. In: SG Pemberton. Applications of ichnology to petroleum exploration, a core workshop 17 17. SEPM Core Workshop. pp. 57-84
- Walker R, James N (1992) Facies Models: Response to Sea Level Change. Geological Association of Canada. p. 407.
- Singh MC, Kundal P, Kushwaha RAS (2010) Ichnology of Bhuban and Bokabil Formations, Oligocene-Miocene deposits of Manipur Western Hill, Northeast India. *J Geological Society Of India* 76: 573-586. doi: 10.1007/s12594-010-0118-5.
- Frey RW, Curran HA, Pemberton SG (1984) Trace making activities of crabs and their environmental significance: The ichnogenus *Psilonichnus*. *J Paleontol* 58: 333–350.
- MacEachern JA, Pemberton SG, Gingras MK, Bann KL (2007) The ichnofacies paradigm: a fifty-year retrospective. In: W Miller. Trace Fossils Concepts Problems Prospects. Amsterdam: Elsevier. pp. 52–77.
